# Supplementary material for: Rigorous Plasma Microbiome Analysis Method Enables Disease Association Discovery in Clinic
Source: Front Microbiol. 2021 Jan 8;11:613268. doi: 10.3389/fmicb.2020.613268 (PMC7820181; doi:10.3389/fmicb.2020.613268)
Supplement: Supplementary file 15 [file Data_Sheet_6.csv]

	Kingdom	Phylum	Class	Order	Family	Genus	Species	SLE-1	SLE-2	Healthy-1	Healthy-2	Healthy-3	Healthy-4	Healthy-5	SLE-3	SLE-4	SLE-5	SLE-6	SLE-7	SLE-8	SLE-9	SLE-10	SLE-11	SLE-12	Healthy-6	Healthy-7	Healthy-8	Healthy-9	SLE-13	Healthy-10	SLE-14	SLE-15	SLE-16	SLE-17	Healthy-11	Healthy-12	SLE-18	SLE-19	Healthy-13	Healthy-14	Healthy-15	Healthy-16	Healthy-17	Healthy-18	Healthy-19	Healthy-20	Healthy-21	water	water
ACAGAGGGTGCAAGCGTTAATCGGAATTACTGGGCGTAAAGCGCGCGTAGGTGGTTCGTTAAGTTGGATGTGAAATCCCCGGGCTCAACCTGGGAACTGCATTCAAAACTGACGAGCTAGAGTATGGTAGAGGGTGGTGGAATTTCCTGTGTAGCGGTGAAATGCGTAGATATAGGAAGGAACACCAGTGGCGAAGGCGACCACCTGGACTGATACTGACACTGAGGTGCGAAAGCGTGGGGAGCAAACAGG	Bacteria	Proteobacteria	Gammaproteobacteria	Pseudomonadales	Pseudomonadaceae	Pseudomonas	arsenicoxydans/avellanae/borealis/brassicacearum/brenneri/chlororaphis/collierea/ficuserectae/fluorescens/frederiksbergensis/gessardii/kilonensis/lini/mandelii/marginalis/migulae/panacis/putida/syringae/thivervalensis/tolaasii/veronii/yamanorum	0	2833	8069	0	200	157	863	5477	0	0	0	592	0	248	577	804	106	836	17	0	395	290	152	467	264	0	76	0	0	0	3317	0	3592	2069	420	0	9842	0	1547	1558	16331	10086
ACGTAGGGTGCGAGCGTTAATCGGAATTACTGGGCGTAAAGCGTGCGCAGGCGGTTATGTAAGACAGATGTGAAATCCCCGGGCTCAACCTGGGAACTGCATTTGTGACTGCATGGCTAGAGTACGGTAGAGGGGGATGGAATTCCGCGTGTAGCAGTGAAATGCGTAGATATGCGGAGGAACACCGATGGCGAAGGCAATCCCCTGGACCTGTACTGACGCTCATGCACGAAAGCGTGGGGAGCAAACAGG	Bacteria	Proteobacteria	Betaproteobacteria	Burkholderiales	Comamonadaceae	Delftia	acidovorans/lacustris/tsuruhatensis	510	6854	4065	950	298	499	1798	48	77	1209	1141	1407	556	276	0	1046	61	975	266	726	412	145	74	166	312	15	230	168	447	546	1072	955	3495	4117	0	0	2980	6316	7265	37	3758	2125
ACGTAGGTGGCAAGCGTTATCCGGAATTATTGGGCGTAAAGCGCGCGTAGGCGGTTTTTTAAGTCTGATGTGAAAGCCCACGGCTCAACCGTGGAGGGTCATTGGAAACTGGAAAACTTGAGTGCAGAAGAGGAAAGTGGAATTCCATGTGTAGCGGTGAAATGCGCAGAGATATGGAGGAACACCAGTGGCGAAGGCGACTTTCTGGTCTGTAACTGACGCTGATGTGCGAAAGCGTGGGGATCAAACAGG	Bacteria	Firmicutes	Bacilli	Bacillales	Staphylococcaceae	Staphylococcus	argenteus/arlettae/aureus/capitis/caprae/devriesei/epidermidis/equorum/haemolyticus/hemolyticus/hominis/lugdunensis/pasteuri/petrasii/saccharolyticus/simiae/warneri/xylosus	36	2826	2242	0	63	1317	832	58	3568	755	595	0	660	91	231	1786	273	6	0	278	0	110	21	8	14	760	27	25	991	1629	0	525	0	2592	426	5584	5733	1702	1662	2205	3688	3258
ACGTAGGTCCCGAGCGTTGTCCGGATTTATTGGGCGTAAAGCGAGCGCAGGCGGTTAGATAAGTCTGAAGTTAAAGGCTGTGGCTTAACCATAGTACGCTTTGGAAACTGTTTAACTTGAGTGCAAGAGGGGAGAGTGGAATTCCATGTGTAGCGGTGAAATGCGTAGATATATGGAGGAACACCGGTGGCGAAAGCGGCTCTCTGGCTTGTAACTGACGCTGAGGCTCGAAAGCGTGGGGAGCAAACAGG	Bacteria	Firmicutes	Bacilli	Lactobacillales	Streptococcaceae	Streptococcus	australis/dentisani/gordonii/infantis/mitis/oligofermentans/oralis/peroris/pneumoniae/pseudopneumoniae/sanguinis/tigurinus	31	849	1711	14	31	20	24	31	27	0	0	353	0	0	0	0	72	0	0	5	5	0	0	0	0	294	0	14	759	8	1885	0	0	3417	0	0	16	0	12	1033	0	0
ACAGAGGGTGCAAGCGTTAATCGGAATTACTGGGCGTAAAGCGCGCGTAGGTGGTTAGTTAAGTTGGATGTGAAATCCCCGGGCTCAACCTGGGAACTGCATTCAAAACTGACTGACTAGAGTATGGTAGAGGGTGGTGGAATTTCCTGTGTAGCGGTGAAATGCGTAGATATAGGAAGGAACACCAGTGGCGAAGGCGACCACCTGGACTGATACTGACACTGAGGTGCGAAAGCGTGGGGAGCAAACAGG	Bacteria	Proteobacteria	Gammaproteobacteria	Pseudomonadales	Pseudomonadaceae	Pseudomonas	antarctica/BA-16-09/brenneri/chlororaphis/denitrificans/extremaustralis/fluorescens/gessardii/marginalis/meridiana/panacis/proteolytica/putida/rhodesiae/veronii	212	0	0	17386	0	0	0	0	896	2156	1265	0	932	0	0	0	0	0	0	546	0	0	0	0	0	809	0	96	795	494	0	356	0	0	0	4227	0	1736	0	0	0	0
ACGTAGGGTGCGAGCGTTATCCGGAATTATTGGGCGTAAAGAGCTCGTAGGCGGTTTGTCGCGTCTGTCGTGAAAGTCCGGGGCTTAACCCCGGATCTGCGGTGGGTACGGGCAGACTAGAGTGCAGTAGGGGAGACTGGAATTCCTGGTGTAGCGGTGGAATGCGCAGATATCAGGAGGAACACCGATGGCGAAGGCAGGTCTCTGGGCTGTAACTGACGCTGAGGAGCGAAAGCATGGGGAGCGAACAGG	Bacteria	Actinobacteria	Actinobacteria	Actinomycetales	Micrococcaceae	Micrococcus	alkanovora/aloeverae/antarcticus/aquilus/cohnii/endophyticus/flavus/indicus/leteus/luteus/thailandicus/yunnanensis	12	14	10	16	49	276	14	0	0	816	0	633	723	412	145	0	268	90	0	11	0	0	23	0	0	0	0	69	365	672	0	339	1826	1106	1581	44	764	0	19	193	56	4426
ACGTAGGGTGCGAGCGTTGTCCGGAATTACTGGGCGTAAAGGGCTCGTAGGTGGTTTGTCGCGTCGTCTGTGAAATTCCGGGGCTTAACTCCGGGCGTGCAGGCGATACGGGCATAACTTGAGTACTGTAGGGGTAACTGGAATTCCTGGTGTAGCGGTGAAATGCGCAGATATCAGGAGGAACACCGATGGCGAAGGCAGGTTACTGGGCAGTTACTGACGCTGAGGAGCGAAAGCATGGGTAGCGAACAGG	Bacteria	Actinobacteria	Actinobacteria	Actinomycetales	Corynebacteriaceae	Corynebacterium	pseudogenitalium/tuberculostearicum	22	1090	14	2793	204	280	393	1082	24	0	421	0	338	0	426	1519	90	0	0	0	0	88	0	0	9	0	0	0	0	290	0	186	0	2881	73	44	2131	0	19	24	12	24
ACGTAGGGTGCAAGCGTTGTCCGGAATTACTGGGCGTAAAGAGCTCGTAGGTGGTTTGTCGCGTCGTCTGTGAAAGCCCGGGGCTTAACTCCGGGTCTGCAGGCGATACGGGCATAACTAGAGTGCTGTAGGGGAGACTGGAATTCCTGGTGTAGCGGTGAAATGCGCAGATATCAGGAGGAACACCGATGGCGAAGGCAGGTCTCTGGGCAGTAACTGACGCTGAGGAGCGAAAGCATGGGGAGCGAACAGG	Bacteria	Actinobacteria	Actinobacteria	Actinomycetales	Corynebacteriaceae	Corynebacterium	NA	0	22	1892	2992	81	281	29	19	17	190	0	606	0	0	0	0	0	0	0	0	173	0	0	0	0	0	0	0	0	0	0	0	886	448	0	5908	15	26	69	3856	5047	33
ACGTAGGGTGCGAGCGTTGTCCGGAATTACTGGGCGTAAAGAGCTCGTAGGCGGTTTGTCACGTCGTCTGTGAAATCCTAGGGCTTAACCCTGGACGTGCAGGCGATACGGGCTGACTTGAGTACTACAGGGGAGACTGGAATTTCTGGTGTAGCGGTGGAATGCACAGATATCAGGAAGAACACCGATGGCGAAGGCAGGTCTCTGGGTAGTAACTGACGCTGAGGAGCGAAAGCATGGGTAGCGAACAGG	Bacteria	Actinobacteria	Actinobacteria	Actinomycetales	Dietziaceae	Dietzia	NA	6	0	0	0	6	0	8	0	0	0	450	317	0	0	223	0	131	468	0	0	0	0	23	0	403	0	0	0	0	292	0	0	0	0	435	0	0	446	9	0	27	1798
ACGTAGGGTGCAAGCGTTAATCGGAATTACTGGGCGTAAAGCGTGCGCAGGCGGTTATGCAAGACAGAGGTGAAATCCCCGGGCTCAACCTGGGAACTGCCTTTGTGACTGCATGGCTAGAGTACGGTAGAGGGGGATGGAATTCCGCGTGTAGCAGTGAAATGCGTAGATATGCGGAGGAACACCGATGGCGAAGGCAATCCCCTGGACCTGTACTGACGCTCATGCACGAAAGCGTGGGGAGCAAACAGG	Bacteria	Proteobacteria	Betaproteobacteria	Burkholderiales	Comamonadaceae	Pelomonas	aquatica/puraquae/saccharophila	0	0	2491	3558	0	520	0	1426	363	0	347	292	116	0	0	206	51	0	151	0	149	0	0	0	238	0	74	0	438	0	0	198	0	0	80	4173	2004	0	0	0	4595	1784
ACGAAGGGGGCTAGCGTTGCTCGGAATCACTGGGCGTAAAGGGTGCGTAGGCGGGTCTTTAAGTCAGGGGTGAAATCCTGGAGCTCAACTCCAGAACTGCCTTTGATACTGAGGATCTTGAGTCCGGAAGAGGTGAGTGGAACTGCGAGTGTAGAGGTGAAATTCGTAGATATTCGCAAGAACACCAGTGGCGAAGGCGGCTCACTGGTCCGGTACTGACGCTGAGGCACGAAAGCGTGGGGAGCAAACAGG	Bacteria	Proteobacteria	Alphaproteobacteria	Rhizobiales	Bradyrhizobiaceae	Bradyrhizobium	NA	0	10	3262	0	25	12	0	0	0	0	0	0	0	0	0	0	92	5	10	8	4	23	17	0	0	0	13	11	0	1013	0	2082	0	0	180	19	24	1699	2599	0	4007	20
ACAGAGGGTGCGAGCGTTAATCGGAATTACTGGGCGTAAAGCGAGTGTAGGTGGCTCATTAAGTCACATGTGAAATCCCCGGGCTTAACCTGGGAACTGCATGTGATACTGGTGGTGCTAGAATATGTGAGAGGGAAGTAGAATTCCAGGTGTAGCGGTGAAATGCGTAGAGATCTGGAGGAATACCGATGGCGAAGGCAGCTTCCTGGCATAATATTGACACTGAGATTCGAAAGCGTGGGTAGCAAACAGG	Bacteria	Proteobacteria	Gammaproteobacteria	Pseudomonadales	Moraxellaceae	Enhydrobacter	aerosaccus	83	14333	19	22	30	25	15	1089	429	1421	369	32	0	97	8	8	1353	4	16	9	16	84	612	4368	24	3809	139	37	0	25	0	0	0	595	21	0	0	0	4	0	5	0
ACGTAGGTGGCAAGCGTTGTCCGGATTTATTGGGCGTAAAGCGAGCGCAGGCGGTCTTTTAAGTCTGATGTGAAAGCCCCCGGCTTAACCGGGGAGGGTCATTGGAAACTGGGAGACTTGAGTGCAGAAGAGGAAAGCGGAATTCCATGTGTAGCGGTGAAATGCGTAGATATATGGAGGAACACCAGTGGCGAAGGCGGCTTTCTGGTCTGTAACTGACGCTGAGGCTCGAAAGCGTGGGGAGCAAACAGG	Bacteria	Firmicutes	Bacilli	Lactobacillales	Enterococcaceae	Enterococcus	cecorum	0	438	0	14	27	20	1611	0	0	0	34	0	0	0	0	0	0	0	0	4576	0	0	146	0	12	0	0	0	0	0	0	571	0	0	0	0	16	8	0	0	0	23
ACAGAGGGTGCAAGCGTTAATCGGAATTACTGGGCGTAAAGCGCGCGTAGGTGGTTTGTTAAGTTGGATGTGAAAGCCCCGGGCTCAACCTGGGAACTGCATCCAAAACTGGCAAGCTAGAGTACGGTAGAGGGTGGTGGAATTTCCTGTGTAGCGGTGAAATGCGTAGATATAGGAAGGAACACCAGTGGCGAAGGCGACCACCTGGACTGATACTGACACTGAGGTGCGAAAGCGTGGGGAGCAAACAGG	Bacteria	Proteobacteria	Gammaproteobacteria	Pseudomonadales	Pseudomonadaceae	Pseudomonas	aeruginosa/argentinensis/benzenivorans/cremoricolorata/cuatrocienegasensis/flavescens/fluorescens/fulva/fuscovaginae/hunanensis/mendocina/monteilii/mosselii/oryzihabitans/parafulva/plecoglossicida/punonensis/putida/segetis/seleniipraecipitans/straminea/taiwanensis	13	0	0	20	0	0	0	1402	0	0	0	0	0	0	196	0	0	0	411	0	0	0	30	0	0	0	64	0	1081	0	0	0	0	0	0	0	0	0	1952	0	31	2944
ACGTAGGGTGCGAGCGTTGTCCGGAATTACTGGGCGTAAAGAGCTCGTAGGTGGTTTGTCGCGTCGTTTGTGTAAGCCCGCAGCTTAACTGCGGGACTGCAGGCGATACGGGCATAACTTGAGTGCTGTAGGGGAGACTGGAATTCCTGGTGTAGCGGTGGAATGCGCAGATATCAGGAGGAACACCGATGGCGAAGGCAGGTCTCTGGGCAGTAACTGACGCTGAGGAGCGAAAGCATGGGTAGCGAACAGG	Bacteria	Actinobacteria	Actinobacteria	Actinomycetales	Corynebacteriaceae	Corynebacterium	afermentans/coyleae/mucifaciens/pilbarense/ureicelerivorans	0	0	10	0	0	0	0	0	22	334	0	0	80	0	0	667	0	0	5	0	0	0	35	0	0	0	69	0	0	0	0	168	0	0	96	22	11	0	3085	11	121	10408
ACGTAGGGTGCGAGCGTTATCCGGATTTATTGGGCGTAAAGGGCTCGTAGGCGGTTCGTCGCGTCCGGTGTGAAAGTCCATCGCCTAACGGTGGATCTGCGCCGGGTACGGGCGGGCTGGAGTGCGGTAGGGGAGACTGGAATTCCCGGTGTAACGGTGGAATGTGTAGATATCGGGAAGAACACCAATGGCGAAGGCAGGTCTCTGGGCCGTTACTGACGCTGAGGAGCGAAAGCGTGGGGAGCGAACAGG	Bacteria	Actinobacteria	Actinobacteria	Bifidobacteriales	Bifidobacteriaceae	Bifidobacterium	animalis/thermacidophilum/thermophilum	137	680	0	12	20	0	514	170	0	1465	434	0	0	0	0	0	171	0	228	3020	0	918	703	145	6	4	17	0	0	4	0	0	0	4	9	0	0	0	0	0	0	0
ACAGAGGGTGCAAGCGTTAATCGGAATTACTGGGCGTAAAGCGCGCGTAGGTGGTTCAGTAAGATGGAAGTGAAATCCCCGGGCTTAACCTGGGAACTGCTTTCATAACTGCTGAGCTAGAGTACGGTAGAGGGTAGTGGAATTTCCTGTGTAGCGGTGAAATGCGTAGATATAGGAAGGAACACCAGTGGCGAAGGCGACTACCTGGACTGATACTGACACTGAGGTGCGAAAGCGTGGGGAGCAAACAGG	Bacteria	Proteobacteria	Gammaproteobacteria	Pseudomonadales	Pseudomonadaceae	Pseudomonas	formosensis/pertucinogena	0	0	0	0	0	6	0	0	0	0	0	0	158	0	541	0	0	457	0	0	0	0	0	0	0	0	0	0	0	0	0	0	0	175	0	0	1599	0	1823	0	2211	10
ACGTAGGGTCCAAGCGTTAATCGGAATTACTGGGCGTAAAGCGTGCGCAGGCGGTTGTGCAAGACCGATGTGAAATCCCCGGGCTTAACCTGGGAATTGCATTGGTGACTGCACGGCTAGAGTGTGTCAGAGGGGGGTAGAATTCCACGTGTAGCAGTGAAATGCGTAGAGATGTGGAGGAATACCGATGGCGAAGGCAGCCCCCTGGGATAACACTGACGCTCATGCACGAAAGCGTGGGGAGCAAACAGG	Bacteria	Proteobacteria	Betaproteobacteria	Burkholderiales	Burkholderiaceae	Ralstonia	insidiosa/pickettii/solanacearum/syzygii	11	2115	1959	30	221	0	443	751	0	0	0	449	0	0	0	0	16	0	0	0	0	0	18	0	0	114	0	0	0	69	0	0	1602	0	0	0	0	0	13	0	0	0
ACGGAGGGTGCAAGCGTTATCCGGATTCATTGGGTTTAAAGGGTCCGCAGGCGGGCTTGTAAGTCAGGGGTGAAAGCCGGCAGCTTAACTGTCGAACTGCCTTTGATACTGCAAGTCTTGAGTGAGGTTGAAGTAGCTGGAATGTGTAGTGTAGCGGTGAAATGCTTAGATATTACACAGAACACCGATAGCGAAGGCAGGTTACTAAGTCTTAACTGACGCTGAGGGACGAAAGCGTGGGGAGCGAACAGG	Bacteria	Bacteroidetes	Flavobacteriia	Flavobacteriales	Flavobacteriaceae	Moheibacter	NA	10	7	0	17	24	13	6	9	11	0	0	0	0	0	0	0	0	0	0	0	0	0	12	0	0	0	0	0	0	0	0	464	0	0	55	5	5	7	33	0	15	11
ACGGAGGGTGCAAGCGTTATCCGGATTTATTGGGTTTAAAGGGTCCGTAGGCGGACTTATAAGTCAGTGGTGAAAGCCCGCAGCTTAACTGTGGAACTGCCATTGATACTGTAAGTCTTGAGTATATTTGAGGTAGCTGGAATAAGTAGTGTAGCGGTGAAATGCATAGATATTACTTAGAACACCAATTGCGAAGGCAGGTTACCAAGATATAACTGACGCTGAGGGACGAAAGCGTGGGGAGCGAACAGG	Bacteria	Bacteroidetes	Flavobacteriia	Flavobacteriales	Flavobacteriaceae	Cloacibacterium	NA	14	5931	0	0	14	19	17	0	0	328	0	0	494	194	0	0	550	0	0	0	12	0	344	650	0	2300	9	23	0	0	0	0	0	0	10	0	0	0	0	0	38	3322
ACGTAGGGTGCGAGCGTTGTCCGGATTTATTGGGCGTAAAGGGCTCGTAGGTGGTTGATCGCGTCGGAAGTGTAATCTTGGGGCTTAACCCTGAGCGTGCTTTCGATACGGGTTGACTTGAGGAAGGTAGGGGAGAATGGAATTCCTGGTGGAGCGGTGGAATGCGCAGATATCAGGAGGAACACCAGTGGCGAAGGCGGTTCTCTGGGCCTTTCCTGACGCTGAGGAGCGAAAGCGTGGGGAGCGAACAGG	Bacteria	Actinobacteria	Actinobacteria	Actinomycetales	Propionibacteriaceae	Propionibacterium	acnes	0	0	27	104	0	0	0	0	0	0	0	13	4	0	5	0	5	0	0	0	0	0	0	0	0	0	0	0	0	5	133	4	0	4	3	2	0	0	0	3	0	12
ACAGAGGGTGCAAGCGTTAATCGGAATTACTGGGCGTAAAGCGCGCGTAGGTGGTTCGTTAAGTTGGATGTGAAATCCCCGGGCTCAACCTGGGAACTGCATTCAAAACTGACGAGCTAGAGTATGGTAGAGGGTGGTGGAATTTCCTGTGTAGCGGTGAAATGCGTAGATATAGGAAGGAACACCAGTGGCGAAGGCGACCACCTGGACTGATACTGACACTGAGGTGCGA	Bacteria	Proteobacteria	Gammaproteobacteria	Pseudomonadales	Pseudomonadaceae	Pseudomonas	arsenicoxydans/avellanae/borealis/brassicacearum/brenneri/cannabina/chlororaphis/collierea/ficuserectae/fluorescens/frederiksbergensis/gessardii/kilonensis/lini/mandelii/marginalis/migulae/panacis/putida/syringae/thivervalensis/tolaasii/veronii/yamanorum	0	13	42	0	0	0	7	31	0	0	0	0	0	0	2	0	0	0	0	0	0	0	0	3	0	0	0	0	0	0	24	0	23	8	0	14	46	0	15	7	93	66
ACGTAGGGTGCGAGCGTTAATCGGAATTACTGGGCGTAAAGCGTGCGCAGGCGGTTATGTAAGACAGATGTGAAATCCCCGGGCTCAACCTGGGAACTGCATTTGTGACTGCATGGCTAGAGTACGGTAGAGGGGGATGGAATTCCGCGTGTAGCAGTGAAATGCGTAGATATGCGGAGGAACACCGATGGCGAAGGCAATCCCCTGGACCTGTACTGACGCTCATGCACGA	Bacteria	Proteobacteria	Betaproteobacteria	Burkholderiales	Comamonadaceae	Delftia	acidovorans/lacustris/tsuruhatensis	0	32	0	0	0	0	12	0	0	5	4	0	0	0	0	0	0	0	0	0	0	0	0	0	0	0	0	0	6	0	13	0	26	12	0	0	17	42	38	0	11	0
ACGTAGGTGGCAAGCGTTATCCGGAATTATTGGGCGTAAAGCGCGCGTAGGCGGTTTTTTAAGTCTGATGTGAAAGCCCACGGCTCAACCGTGGAGGGTCATTGGAAACTGGAAAACTTGAGTGCAGAAGAGGAAAGTGGAATTCCATGTGTAGCGGTGAAATGCGCAGAGATATGGAGGAACACCAGTGGCGAAGGCGACTTTCTGGTCTGTAACTGACGCTGATGTGCGA	Bacteria	Firmicutes	Bacilli	Bacillales	Staphylococcaceae	Staphylococcus	argenteus/arlettae/aureus/capitis/caprae/devriesei/epidermidis/equorum/haemolyticus/hemolyticus/hominis/lugdunensis/pasteuri/petrasii/saccharolyticus/simiae/warneri/xylosus	0	11	0	0	0	8	3	0	16	0	0	0	0	0	0	0	0	0	0	0	0	0	0	0	0	0	0	0	6	5	0	0	0	8	0	29	23	6	8	14	8	14
[truncated: 11 more columns]
