# Supplementary material for: Rigorous Plasma Microbiome Analysis Method Enables Disease Association Discovery in Clinic
Source: Front Microbiol. 2021 Jan 8;11:613268. doi: 10.3389/fmicb.2020.613268 (PMC7820181; doi:10.3389/fmicb.2020.613268)
Supplement: Supplementary file 18 [file Data_Sheet_9.csv]

	Kingdom	Phylum	Class	Order	Family	Genus	Species	Non_smoker-1	Smoker-1	Non_smoker-2	Smoker-2	Smoker-3	Smoker-4	Smoker-5	Smoker-6	Smoker-7	Smoker-8	Smoker-9	Smoker-10	Smoker-11	Smoker-12	Smoker-13	Smoker-14	Smoker-15	Non_smoker-3	Non_smoker-4	Smoker-16	Non_smoker-5	Smoker-17	Smoker-18	Non_smoker-6	Non_smoker-7	Smoker-19	Non_smoker-8	Non_smoker-9	Non_smoker-10	Non_smoker-11	Smoker-20	Non_smoker-12	Non_smoker-13	Non_smoker-14	Non_smoker-15	Non_smoker-16	Non_smoker-17	Non_smoker-18	Non_smoker-19	Non_smoker-20	Non_smoker-21	water
ACAGAGGGTGCAAGCGTTAATCGGAATTACTGGGCGTAAAGCGCGCGTAGGTGGTTCGTTAAGTTGGATGTGAAATCCCCGGGCTCAACCTGGGAACTGCATTCAAAACTGACGAGCTAGAGTATGGTAGAGGGTGGTGGAATTTCCTGTGTAGCGGTGAAATGCGTAGATATAGGAAGGAACACCAGTGGCGAAGGCGACCACCTGGACTGATACTGACACTGAGGTGCGAAAGCGTGGGGAGCAAACAGG	Bacteria	Proteobacteria	Gammaproteobacteria	Pseudomonadales	Pseudomonadaceae	Pseudomonas	arsenicoxydans/avellanae/borealis/brassicacearum/brenneri/chlororaphis/collierea/ficuserectae/fluorescens/frederiksbergensis/gessardii/kilonensis/lini/mandelii/marginalis/migulae/panacis/putida/syringae/thivervalensis/tolaasii/veronii/yamanorum	0	1224	0	841	7165	2117	0	3108	0	4909	15070	0	0	2920	0	0	0	10319	0	3769	0	0	10159	4887	0	0	3765	0	0	8939	0	0	8590	6082	11970	3297	2953	10496	19459	23103	19401	11771
ACGTAGGGTGCGAGCGTTAATCGGAATTACTGGGCGTAAAGCGTGCGCAGGCGGTTATGTAAGACAGATGTGAAATCCCCGGGCTCAACCTGGGAACTGCATTTGTGACTGCATGGCTAGAGTACGGTAGAGGGGGATGGAATTCCGCGTGTAGCAGTGAAATGCGTAGATATGCGGAGGAACACCGATGGCGAAGGCAATCCCCTGGACCTGTACTGACGCTCATGCACGAAAGCGTGGGGAGCAAACAGG	Bacteria	Proteobacteria	Betaproteobacteria	Burkholderiales	Comamonadaceae	Delftia	acidovorans/lacustris/tsuruhatensis	0	425	145	7229	9739	3242	37	1868	13756	84	6315	20729	22132	1519	19651	107	452	8105	3160	3503	13501	322	3506	165	4146	103	80	0	28152	7902	357	1446	9085	1908	96	5659	752	17399	105	14591	76	2942
ACGTAGGTGGCAAGCGTTATCCGGAATTATTGGGCGTAAAGCGCGCGTAGGCGGTTTTTTAAGTCTGATGTGAAAGCCCACGGCTCAACCGTGGAGGGTCATTGGAAACTGGAAAACTTGAGTGCAGAAGAGGAAAGTGGAATTCCATGTGTAGCGGTGAAATGCGCAGAGATATGGAGGAACACCAGTGGCGAAGGCGACTTTCTGGTCTGTAACTGACGCTGATGTGCGAAAGCGTGGGGATCAAACAGG	Bacteria	Firmicutes	Bacilli	Bacillales	Staphylococcaceae	Staphylococcus	argenteus/arlettae/aureus/capitis/caprae/devriesei/epidermidis/equorum/haemolyticus/hemolyticus/hominis/lugdunensis/pasteuri/petrasii/saccharolyticus/simiae/warneri/xylosus	0	65	0	80	53	27	21	67	5998	10163	67	12893	41	59	22	322	61	35	2132	1926	31	117	6067	20	57	67	132	0	62	51	179	1698	12235	113	14073	38	195	51	41	39	62	52
ACGTAGGGTGCGAGCGTTGTCCGGAATTACTGGGCGTAAAGAGCTCGTAGGTGGTTTGTCGCGTCGTCTGTGAAATTCCGGGGCTTAACTTCGGGCGTGCAGGCGATACGGGCATAACTTGAGTGCTGTAGGGGAGACTGGAATTCCTGGTGTAGCGGTGGAATGCGCAGATATCAGGAGGAACACCGATGGCGAAGGCAGGTCTCTGGGCAGTAACTGACGCTGAGGAGCGAAAGCATGGGGAGCGAACAGG	Bacteria	Actinobacteria	Actinobacteria	Actinomycetales	Corynebacteriaceae	Corynebacterium	diphtheriae/vitaeruminis	43	88	15376	7589	137	0	16	124	74	48	0	104	10057	128	50	68	99	78	24	0	46	89	31	4759	2247	54	943	0	64	52	1485	61787	61	7918	56	2181	902	35	9354	30	48	43
ACGTAGGTCCCGAGCGTTGTCCGGATTTATTGGGCGTAAAGCGAGCGCAGGCGGTTAGATAAGTCTGAAGTTAAAGGCTGTGGCTTAACCATAGTATGCTTTGGAAACTGTTTAACTTGAGTGCAGAAGGGGAGAGTGGAATTCCATGTGTAGCGGTGAAATGCGTAGATATATGGAGGAACACCGGTGGCGAAAGCGGCTCTCTGGTCTGTAACTGACGCTGAGGCTCGAAAGCGTGGGGAGCAAACAGG	Bacteria	Firmicutes	Bacilli	Lactobacillales	Streptococcaceae	Streptococcus	sanguinis	0	11561	17	8640	72	3566	128	109	19069	2234	15383	67	83	19985	0	1091	12340	4498	35	10595	0	2500	37	120	3175	97	20181	289	213	112	28505	1984	31	0	0	17	35	25	0	0	0	30
ACAGAGGGTGCAAGCGTTAATCGGATTTACTGGGCGTAAAGCGCGCGTAGGTGGCCAATTAAGTCAAATGTGAAATCCCCGAGCTTAACTTGGGAATTGCATTCGATACTGGTTGGCTAGAGTATGGGAGAGGATGGTAGAATTCCAGGTGTAGCGGTGAAATGCGTAGAGATCTGGAGGAATACCGATGGCGAAGGCAGCCATCTGGCCTAATACTGACACTGAGGTGCGAAAGCATGGGGAGCAAACAGG	Bacteria	Proteobacteria	Gammaproteobacteria	Pseudomonadales	Moraxellaceae	Acinetobacter	baumannii/lwoffii/oleivorans/pittii	0	629	11	28	41	17	12	29	33	33	22	12930	20	0	27	37	22	4067	4959	13	10	49	4310	17214	13	14	90	24	62	61	1608	97	53	86	21005	89804	94	319	1193	8457	23936	73
ACAGAGGATGCAAGCGTTATCCGGAATGATTGGGCGTAAAGCGTCTGTAGGTGGCTTTTTAAGTCCGCCGTCAAATCCCAGGGCTCAACCCTGGACAGGCGGTGGAAACTACCAAGCTGGAGTACGGTAGGGGCAGAGGGAATTTCCGGTGGAGCGGTGAAATGCGTAGAGATCGGAAAGAACACCAACGGCGAAAGCACTCTGCTGGGCCGACACTGACACTGAGAGACGAAAGCTAGGGGAGCGAATGGG	Bacteria	Cyanobacteria/Chloroplast	Chloroplast	Chloroplast	Streptophyta	NA	NA	0	25	0	32	4511	29	1002	4699	32	22	5393	7222	1693	896	19	820	62	1256	5507	1836	12271	11793	2170	18	2096	20	30	18	4446	15	753	371	10840	21	4544	0	535	1661	26	1821	4793	2060
ACGTAGGTGACAAGCGTTGTCCGGAATTATTGGGCGTAAAGGGAGCGCAGGCGGTTGGAATAGTCTGATGTGAAAGCCCACGGCTTAACCGTGGAATTGCATTGGAAACTGTCCAACTTGAATGCAGAAGAGGAAAGCGGAATTCCATGTGTAGCGGTGAAATGCGTAGATATATGGAGGAACACCAGTGGCGAAGGCGGCTTTCTGGTCTGTGATTGACGCTGAGGCTCGAAAGCGTGGGGAGCGAACAGG	Bacteria	Firmicutes	Bacilli	Lactobacillales	Carnobacteriaceae	Atopostipes	NA	1397	74	25	3041	320	32	0	6343	5906	7561	5094	150	282	1060	23	114	2084	4683	21	1473	17	2075	117	45	2510	44	104	10	50	69	89	462	3258	2315	34	47	114	9198	196	7605	51	7115
ACGGAGGGTGCGAGCGTTAATCGGAATTACTGGGCGTAAAGCGCGCGTAGGCGGCGTGATAAGCCGGTTGTGAAAGCCCCGGGCTCAACCTGGGAACGGCATCCGGAACTGTCAGGCTAGAGTGCAGGAGAGGAAGGTAGAATTCCCGGTGTAGCGGTGAAATGCGTAGAGATCGGGAGGAATACCAGTGGCGAAGGCGGCCTTCTGGACTGACACTGACGCTGAGGTGCGAAAGCGTGGGTAGCAAACAGG	Bacteria	Proteobacteria	Gammaproteobacteria	Oceanospirillales	Halomonadaceae	Halomonas	aidingensis/alimentaria/denitrificans/desiderata/fontilapidosi/lutea/muralis/nitroreducens/rifensis/salina/stenophila/ventosae	653	0	177	366	7149	265	504	3290	12105	3771	1927	815	3190	229	1809	153	1622	1324	1342	1041	2149	2446	933	374	1374	4712	1346	17	31	128	1546	493	1450	654	6842	1718	1197	2274	3697	0	2649	0
ACGTAGGTGGCAAGCGTTGTCCGGATTTATTGGGCGTAAAGCGAGCGCAGGCGGTCTTTTAAGTCTGATGTGAAAGCCCCCGGCTTAACCGGGGAGGGTCATTGGAAACTGGGAGACTTGAGTGCAGAAGAGGAAAGCGGAATTCCATGTGTAGCGGTGAAATGCGTAGATATATGGAGGAACACCAGTGGCGAAGGCGGCTTTCTGGTCTGTAACTGACGCTGAGGCTCGAAAGCGTGGGGAGCAAACAGG	Bacteria	Firmicutes	Bacilli	Lactobacillales	Enterococcaceae	Enterococcus	cecorum	0	25	0	3842	20	110	7	20	24	23	30	1383	20	16	0	105	28	10	0	26	0	57	29	0	18	0	32	0	0	0	61	444	31	36	17	32	7395	0	0	0	26	35
ACGAAGGGTGCAAGCGTTACTCGGAATTACTGGGCGTAAAGCGTGCGTAGGTGGTTATTTAAGTCCGTTGTGAAAGCCCTGGGCTCAACCTGGGAACTGCAGTGGATACTGGATGACTAGAATGTGGTAGAGGGTAGCGGAATTCCTGGTGTAGCAGTGAAATGCGTAGAGATCAGGAGGAACATCCATGGCGAAGGCAGCTACCTGGACCAACATTGACACTGAGGCACGAAAGCGTGGGGAGCAAACAGG	Bacteria	Proteobacteria	Gammaproteobacteria	Xanthomonadales	Xanthomonadaceae	Stenotrophomonas	maltophilia	0	0	1304	30	40	23	9	36	28	4175	35	16930	0	0	31	576	979	14	18	562	21	24	34	0	26	20	1781	0	9155	0	15	10	7	0	9	0	0	0	11	0	17	10451
ACGTAGGTGGCAAGCGTTGTCCGGAATTATTGGGCGTAAAGCGCGCGCAGGCGGTTCCTTAAGTCTGATGTGAAAGCCCACGGCTCAACCGTGGAGGGTCATTGGAAACTGGGGGACTTGAGTGCAGAAGAGGAGAGCGGAATTCCACGTGTAGCGGTGAAATGCGTAGAGATGTGGAGGAACACCAGTGGCGAAGGCGGCTCTCTGGTCTGTAACTGACGCTGAGGCGCGAAAGCGTGGGGAGCAAACAGG	Bacteria	Firmicutes	Bacilli	Bacillales	Bacillaceae_1	Anoxybacillus	amylolyticus/beppuensis/bogrovensis/flavithermus/gonensis/hidirlerensis/kamchatkensis/kaynarcensis/kestanbolensis/mongoliensis/pushchinoensis/rupiensis/thermarum/tunisiense/voinovskiensis	0	0	0	58	0	504	0	53	48	56	51	71	42	39	0	140	35	0	0	0	46	63	51	37	4431	3724	0	0	0	0	74	307	48	0	57	46	27020	0	0	32	0	0
ACGTAGGGTGCAAGCGTTAATCGGAATTACTGGGCGTAAAGCGTGCGCAGGCGGTTTTGTAAGTCTGACGTGAAATCCCCGGGCTCAACCTGGGAATTGCGTTGGAGACTGCAAGGCTGGAGTCTGGCAGAGGGGGGTAGAATTCCACGTGTAGCAGTGAAATGCGTAGAGATGTGGAGGAACACCGATGGCGAAGGCAGCCCCCTGGGTCAAGACTGACGCTCATGCACGAAAGCGTGGGGAGCAAACAGG	Bacteria	Proteobacteria	Betaproteobacteria	Burkholderiales	Oxalobacteraceae	Massilia	aerilata/aurea/consociata/niastensis/norwichensis/tieshanensis/timonae/varians	1880	23	24	45	3920	43	0	37	45	40	43	29	38	35	54	73	57	27	26	31	0	50	45	31	45	6720	0	0	0	0	0	0	0	0	0	0	0	0	0	0	0	17
ACGTAGGTCCCGAGCGTTGTCCGGATTTATTGGGCGTAAAGCGAGCGCAGGCGGTTTGATAAGTCTGAAGTTAAAGGCTGTGGCTCAACCATAGTTCGCTTTGGAAACTGTCAAACTTGAGTGCAGAAGGGGAGAGTGGAATTCCATGTGTAGCGGTGAAATGCGTAGATATATGGAGGAACACCGGTGGCGAAAGCGGCTCTCTGGTCTGTAACTGACGCTGAGGCTCGAAAGCGTGGGGAGCGAACAGG	Bacteria	Firmicutes	Bacilli	Lactobacillales	Streptococcaceae	Streptococcus	salivarius/vestibularis	0	17	7	32	3760	0	0	0	0	0	19	0	0	18	0	14	23	9	0	11	0	19	0	0	0	0	53	0	0	37	79	0	0	1741	0	344	35	0	0	0	0	0
ACGTAGGTGGCAAGCGTTATCCGGATTTATTGGGCGTAAAGGGAACGCAGGCGGTCTTTTAAGTCTGATGTGAAAGCCTTCGGCTTAACCGGAGTAGTGCATTGGAAACTGGGAGACTTGAGTGCAGAAGAGGAGAGTGGAACTCCATGTGTAGCGGTGAAATGCGTAGATATATGGAAGAACACCAGTGGCGAAAGCGGCTCTCTGGTCTGTAACTGACGCTGAGGTTCGAAAGCGTGGGTAGCAAACAGG	Bacteria	Firmicutes	Bacilli	Lactobacillales	Lactobacillaceae	Lactobacillus	animalis/apodemi/crispatus/faecis/murinus	0	22	15	33	51	1882	20	31	27	20	39	19	24	37	22	87	28	30	18	26	0	55	18	28	14	22	0	0	0	0	0	0	0	0	0	0	0	0	0	0	0	4602
ACGTAGGTGACGAGCGTTGTCCGGAATTATTGGGCGTAAAGGGAGCGCAGGCGGTTGGAATAGTCTGATGTGAAAGCCCACGGCTTAACCGTGGAAGGTCATTGGAAACTGTCCAACTTGAATGCAGAAGAGGAGAGTGGAATTCCATGTGTAGCGGTGAAATGCGTAGATATATGGAGGAACACCAGTGGCGAAGGCGACTTTCTGGTCTGTAATTGACGCTGAGGCTCGAAAGCGTGGGTAGCGAACAGG	Bacteria	Firmicutes	Bacilli	Lactobacillales	Carnobacteriaceae	Atopostipes	NA	30	0	344	0	0	0	0	70	1294	0	105	95	2118	0	23	0	0	35	0	0	0	4492	10601	0	139	0	1458	0	0	5429	0	0	0	41	0	0	0	0	0	0	0	5417
ACGTAGGTGGCAAGCGTTGTCCGGAATTATTGGGCGTAAAGCGCGCGCAGGTGGTTTAATAAGTCTGATGTGAAAGCCCACGGCTCAACCGTGGAGGGTCATTGGAAACTGTTAAACTTGAGTGCAGGAGAGAAAAGTGGAATTCCTAGTGTAGCGGTGAAATGCGTAGAGATTAGGAGGAACACCAGTGGCGAAGGCGGCTTTTTGGCCTGTAACTGACACTGAGGCGCGAAAGCGTGGGGAGCAAACAGG	Bacteria	Firmicutes	Bacilli	Bacillales	Bacillales_Incertae_Sedis_XI	Gemella	haemolysans/morbillorum/sanguinis	0	0	0	0	6	0	388	4	0	11	10	0	9	1131	0	22	0	0	0	0	0	10	10	0	0	0	14	0	0	12	12	10	8	12	0	95	21	8	0	0	0	17
ACGTAGGGGGCGAGCGTTGTCCGGAATGATTGGGCGTAAAGCGCGCGCAGGCGGTCCTTTAAGTCTGATGTAAAAGCCCGCGGCTTAACCGCGGAAGGTCATTGGAAACTGGGGGACTTGAGGCTAGGAGAGGGAAGTGGAATTCCTGGTGTAGCGGTGAAATGCGTAGAGATCAGGAGGAATACCGATGGCGAAAGCAACTTCCTGGCTTAGAACTGACGCTGAGGCGCGAAAGCGTGGGGAGCAAACAGG	Bacteria	Firmicutes	Bacilli	Bacillales	Bacillales_Incertae_Sedis_X	Thermicanus	NA	0	11	0	31	0	9	0	24	17	0	15	24	44	16	0	60	22	8	5	8	20	23	16	5528	28	3282	12	0	0	0	24	778	0	31	8014	9	7546	0	0	4	0	0
ACGTAGGGCGCGAGCGTTGTCCGGAATTATTGGGCGTAAAGAGCTTGTAGGCGGTTGGTCGCGTCTGCTGTGAAAGGCCGGGGCTTAACTCCGGTTTTGCAGTGGGTACGGGCTAACTAGAGTGCAGTAGGGGAGACTGGAATTCCTGGTGTAGCGGTGGAATGCACAGATATCAGGAGGAACACCGATGGCGAAGGCAGGTCTCTGGGCTGTAACTGACGCTGAGAAGCGAAAGCATGGGGAGCGAACAGG	Bacteria	Actinobacteria	Actinobacteria	Actinomycetales	Micrococcaceae	Rothia	aeria/dentocariosa	0	197	0	2983	0	25	0	0	16	0	0	0	20	10549	0	0	42	13	15	5222	0	0	0	0	0	0	2751	42	0	0	4683	1486	0	0	0	1889	0	0	0	0	0	0
ACGTAGGGCGCGAGCGTTGTCCGGAATTATTGGGCGTAAAGAGCTCGTAGGCGGCTGGTCGCGTCTGTCGTGAAATCCTCTGGCTTAACTGGGGGCTTGCGGTGGGTACGGGCCGGCTTGAGTGCGGTAGGGGAGGCTGGAACTCCTGGTGTAGCGGTGGAATGCGCAGATATCAGGAAGAACACCGGTGGCGAAGGCGGGTCTCTGGGCCGTTACTGACGCTGAGGAGCGAAAGCGTGGGGAGCGAACAGG	Bacteria	Actinobacteria	Actinobacteria	Actinomycetales	Actinomycetaceae	Actinomyces	johnsonii/naeslundii/oris	0	1394	329	458	0	504	0	0	29	0	1332	0	11	1382	64	294	1926	753	0	1083	0	924	0	0	0	0	2559	48	0	1345	2983	288	7	998	9	0	0	0	0	0	0	892
ACGTAGGTGGCAAGCGTTGTCCGGAATTATTGGGCGTAAAGCGCGCGCAGGCGGATCAGTCAGTCTGTCTTAAAAGTTCGGGGCTTAACCCCGTGATGGGATGGAAACTGCTGATCTAGAGTATCGGAGAGGAAAGTGGAATTCCTAGTGTAGCGGTGAAATGCGTAGATATTAGGAAGAACACCAGTGGCGAAGGCGACTTTCTGGACGAAAACTGACGCTGAGGCGCGAAAGCCAGGGGAGCGAACGGG	Bacteria	Firmicutes	Negativicutes	Selenomonadales	Veillonellaceae	Veillonella	parvula/rogosae/tobetsuensis	0	1092	0	12848	14	0	0	0	88	0	0	0	0	548	0	0	2428	0	0	463	0	1242	0	21	0	0	0	0	36	0	40	0	0	0	0	0	0	0	0	0	0	14
ACGGAGGGTGCAAGCGTTAATCGGAATTACTGGGCGTAAAGCGCACGTAGGTGGTTTGTTAAGCTAGCTGTGAAATCCCCGGGCTCAACCTGGGCACTGCAGTTAGAACTGGCAAGCTAGAGTAGGGTAGAGGGGTGTGGAATTCCAGGTGTAGCGGTGAAATGCGTAGATATCTGGAGGAACATCAGTGGCGAAGGCGACACCCTGGACTCATACTGACACTGAGGTGCGAAAGCGTGGGGAGCAAACAGG	Bacteria	Proteobacteria	Gammaproteobacteria	Pseudomonadales	Pseudomonadaceae	Cellvibrio	fibrivorans/mixtus/ostraviensis	13	0	0	4	0	0	0	0	711	4	6	4	77	0	0	0	0	0	5	0	0	6	3126	0	0	143	0	0	0	5	0	0	3917	0	0	0	0	9	0	0	0	0
ACGTAGGGTGCGAGCGTTGTCCGGATTTATTGGGCGTAAAGGGCTCGTAGGTGGTTGATCGCGTCGGAAGTGTAATCTTGGGGCTTAACCCTGAGCGTGCTTTCGATACGGGTTGACTTGAGGAAGGTAGGGGAGAATGGAATTCCTGGTGGAGCGGTGGAATGCGCAGATATCAGGAGGAACACCAGTGGCGAAGGCGGTTCTCTGGGCCTTTCCTGACGCTGAGGAGCGAAAGCGTGGGGAGCGAACAGG	Bacteria	Actinobacteria	Actinobacteria	Actinomycetales	Propionibacteriaceae	Propionibacterium	acnes	13	3	0	0	0	16	109	0	5	143	0	60	2	0	0	0	50	0	9	0	0	28	13	0	12	0	3	0	227	700	0	14	0	0	9	23	11	9	44	657	0	0
ACAGAGGGTGCAAGCGTTAATCGGAATTACTGGGCGTAAAGCGCGCGTAGGTGGTTCGTTAAGTTGGATGTGAAATCCCCGGGCTCAACCTGGGAACTGCATTCAAAACTGACGAGCTAGAGTATGGTAGAGGGTGGTGGAATTTCCTGTGTAGCGGTGAAATGCGTAGATATAGGAAGGAACACCAGTGGCGAAGGCGACCACCTGGACTGATACTGACACTGAGGTGCGA	Bacteria	Proteobacteria	Gammaproteobacteria	Pseudomonadales	Pseudomonadaceae	Pseudomonas	arsenicoxydans/avellanae/borealis/brassicacearum/brenneri/cannabina/chlororaphis/collierea/ficuserectae/fluorescens/frederiksbergensis/gessardii/kilonensis/lini/mandelii/marginalis/migulae/panacis/putida/syringae/thivervalensis/tolaasii/veronii/yamanorum	0	0	0	0	43	20	0	28	0	29	0	0	0	15	0	4	0	64	0	31	0	0	0	0	0	0	29	0	0	39	0	7	49	53	60	0	24	85	129	159	118	81
ACGTAGGGTGCGAGCGTTAATCGGAATTACTGGGCGTAAAGCGTGCGCAGGCGGTTATGTAAGACAGATGTGAAATCCCCGGGCTCAACCTGGGAACTGCATTTGTGACTGCATGGCTAGAGTACGGTAGAGGGGGATGGAATTCCGCGTGTAGCAGTGAAATGCGTAGATATGCGGAGGAACACCGATGGCGAAGGCAATCCCCTGGACCTGTACTGACGCTCATGCACGA	Bacteria	Proteobacteria	Betaproteobacteria	Burkholderiales	Comamonadaceae	Delftia	acidovorans/lacustris/tsuruhatensis	0	7	0	42	58	35	0	0	61	0	43	149	123	0	164	0	0	55	29	25	75	0	24	0	35	0	0	0	169	50	0	15	58	29	0	32	7	104	0	99	0	0
ACAGAGGGTGCAAGCGTTAATCGGAATTACTGGGCGTAAAGCGCGCGTAGGTGGTTAGTTAAGTTGGATGTGAAATCCCCGGGCTCAACCTGGGAACTGCATTCAAAACTGACTGACTAGAGTATGGTAGAGGGTGGTGGAATTTCCTGTGTAGCGGTGAAATGCGTAGATATAGGAAGGAACACCAGTGGCGAAGGCGACCACCTGGACTGATACTGACACTGAGGTGCGA	Bacteria	Proteobacteria	Gammaproteobacteria	Pseudomonadales	Pseudomonadaceae	Pseudomonas	antarctica/BA-16-09/brenneri/chlororaphis/denitrificans/extremaustralis/fluorescens/gessardii/marginalis/meridiana/panacis/proteolytica/putida/rhodesiae/veronii	0	0	2	0	0	0	19	0	104	0	89	41	75	0	154	0	0	0	100	0	19	0	58	19	92	50	0	0	66	0	10	0	0	0	0	14	0	0	0	0	0	0
ACGTAGGTCCCGAGCGTTGTCCGGATTTATTGGGCGTAAAGCGAGCGCAGGCGGTTAGATAAGTCTGAAGTTAAAGGCTGTGGCTTAACCATAGTACGCTTTGGAAACTGTTTAACTTGAGTGCAAGAGGGGAGAGTGGAATTCCATGTGTAGCGGTGAAATGCGTAGATATATGGAGGAACACCGGTGGCGAAAGCGGCTCTCTGGCTTGTAACTGACGCTGAGGCTCGA	Bacteria	Firmicutes	Bacilli	Lactobacillales	Streptococcaceae	Streptococcus	australis/dentisani/gordonii/infantis/mitis/oligofermentans/oralis/peroris/pneumoniae/pseudopneumoniae/sanguinis/tigurinus	0	85	0	99	0	30	103	0	0	0	34	0	0	123	0	0	120	0	0	0	0	44	0	0	84	0	167	0	21	71	193	15	0	0	0	0	8	0	0	0	0	0
ACGTAGGTCCCGAGCGTTGTCCGGATTTATTGGGCGTAAAGCGAGCGCAGGCGGTTAGATAAGTCTGAAGTTAAAGGCTGTGGCTTAACCATAGTATGCTTTGGAAACTGTTTAACTTGAGTGCAGAAGGGGAGAGTGGAATTCCATGTGTAGCGGTGAAATGCGTAGATATATGGAGGAACACCGGTGGCGAAAGCGGCTCTCTGGTCTGTAACTGACGCTGAGGCTCGA	Bacteria	Firmicutes	Bacilli	Lactobacillales	Streptococcaceae	Streptococcus	sanguinis	0	89	0	52	0	0	0	0	111	0	88	0	0	165	0	0	69	21	0	73	0	19	0	0	32	0	129	0	0	0	213	0	0	0	0	0	0	0	0	0	0	0
ACGGAGGGTGCGAGCGTTAATCGGAATTACTGGGCGTAAAGCGCGCGTAGGCGGCGTGATAAGCCGGTTGTGAAAGCCCCGGGCTCAACCTGGGAACGGCATCCGGAACTGTCAGGCTAGAGTGCAGGAGAGGAAGGTAGAATTCCCGGTGTAGCGGTGAAATGCGTAGAGATCGGGAGGAATACCAGTGGCGAAGGCGGCCTTCTGGACTGACACTGACGCTGAGGTGCGA	Bacteria	Proteobacteria	Gammaproteobacteria	Oceanospirillales	Halomonadaceae	Halomonas	aidingensis/alimentaria/denitrificans/desiderata/fontilapidosi/lutea/muralis/nitroreducens/rifensis/salina/stenophila/ventosae	6	0	0	0	36	0	0	27	77	31	11	0	15	0	18	5	9	0	13	0	11	21	0	0	7	32	15	0	0	0	5	0	0	0	23	18	0	16	20	0	0	0
[truncated: 4 more columns]
